# Supplementary material
Source: Springer Nature journal article supplement (https://www.springermedizin.de/resource/supplementary/12885_2008_1432_MOESM1_ESM.pdf/9473138)
Supplement: MOESM1 [file 9473138]

**Additional file 1****Number of women diagnosed with breast cancer in the Girona Cancer Registry by age and stage.**

| Period    | Stage                 | Age (yrs.) |       |       |       |     | Total |
|-----------|-----------------------|------------|-------|-------|-------|-----|-------|
|           |                       | ≤39        | 40-49 | 50-59 | 60-69 | ≥70 |       |
| 1980-1989 | SEER Historical stage |            |       |       |       |     |       |
|           | Localized             | 35         | 83    | 117   | 141   | 142 | 518   |
|           | Regional              | 54         | 117   | 135   | 145   | 167 | 618   |
|           | Distant               | 5          | 15    | 24    | 38    | 48  | 130   |
| 1990-2001 | AJCC stage            |            |       |       |       |     |       |
|           | I                     | 27         | 102   | 103   | 107   | 67  | 406   |
|           | II-                   | 27         | 46    | 41    | 55    | 49  | 218   |
|           | II+                   | 41         | 90    | 93    | 75    | 68  | 367   |
|           | III                   | 12         | 35    | 39    | 34    | 49  | 169   |
|           | IV                    | 10         | 18    | 13    | 32    | 34  | 107   |
